# Supplementary material for: LaF3:Ln mesoporous spheres: controllable synthesis, tunable luminescence and application for dual-modal chemo-/photo-thermal therapy
Source: Royal Society of Chemistry journal article supplement (doi:10.1039/c4nr04336g), 2014-01-01
Supplement: c4nr04336g1.pdf [file c4nr04336g1.pdf]

## Electronic Supplementary Information

### **LaF<sub>3</sub>:Ln mesoporous spheres: controllable synthesis, tunable luminescence and application for dual-modal chemo-/photo-thermal therapy**

Ruichan Lv, Guixin Yang, Fei, He\*, Yunlu Dai, Shili Gai, and Piaoping Yang\*

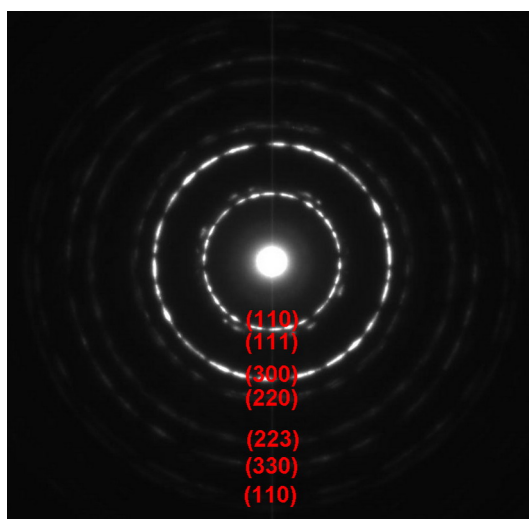

**Fig. S1.** SAED pattern of flower-like LaF<sub>3</sub>:Yb,Er spheres.

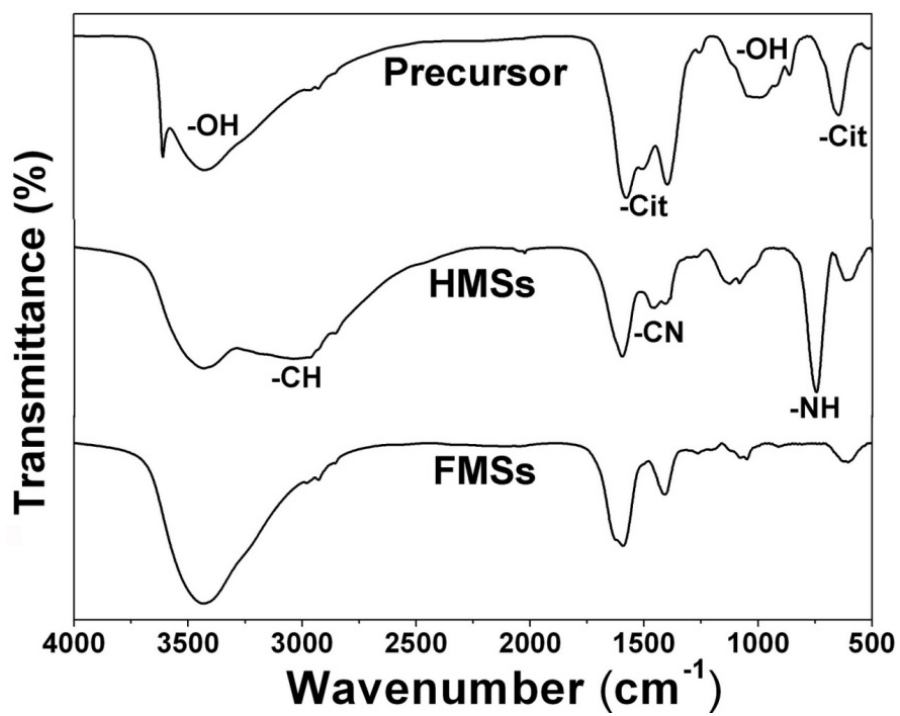

**Fig. S2.** FT-IR spectra of the  $\text{La}(\text{OH})_3:\text{Ln}$  precursor,  $\text{LaF}_3:\text{Ln}$  HMSs and  $\text{LaF}_3:\text{Ln}$  FMSs.

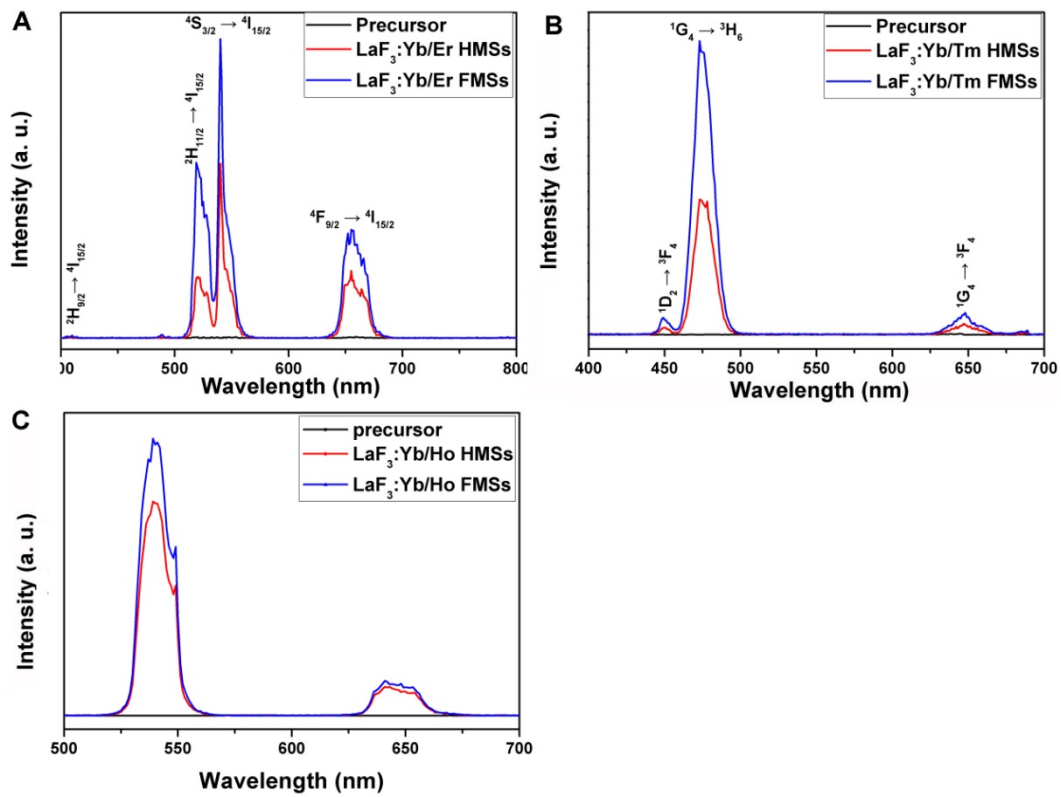

**Fig. S3** UC emission spectra of (A) the  $La(OH)_3:Yb/Er$  precursor,  $LaF_3:Yb/Er$  HMSs,  $LaF_3:Yb/Er$  FMSs; (B)  $La(OH)_3:Yb/Tm$  precursor,  $LaF_3:Yb/Tm$  HMSs,  $LaF_3:Yb/Tm$  FMSs; (C)  $La(OH)_3:Yb/Ho$  precursor,  $LaF_3:Yb/Ho$  HMSs and  $LaF_3:Yb/Ho$  FMSs under 980 nm NIR excitation.

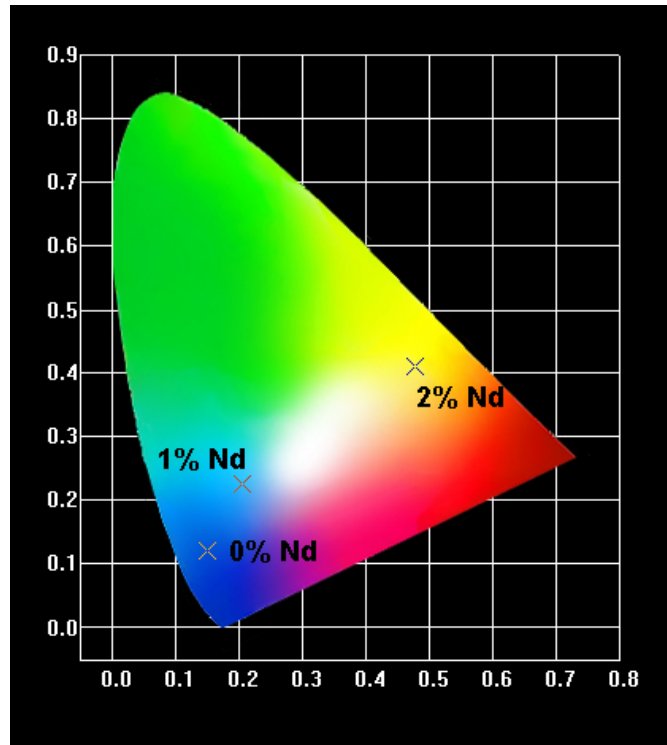

**Figure S4.** CIE chromaticity diagram of  $\text{LaF}_3:10\%\text{Yb}/0.5\%\text{Tm}/x\%\text{Nd}$  ( $x = 0, 1,$  and  $2$ ) under 980 nm NIR excitation.

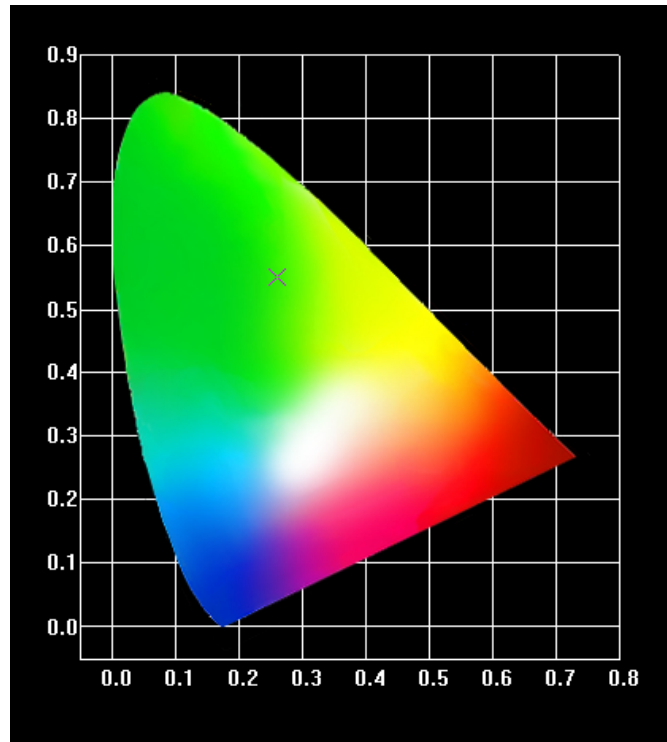

**Figure S5.** CIE chromaticity diagram of LaF<sub>3</sub>:Yb/Er/Tm/Nd under 980 nm NIR excitation.

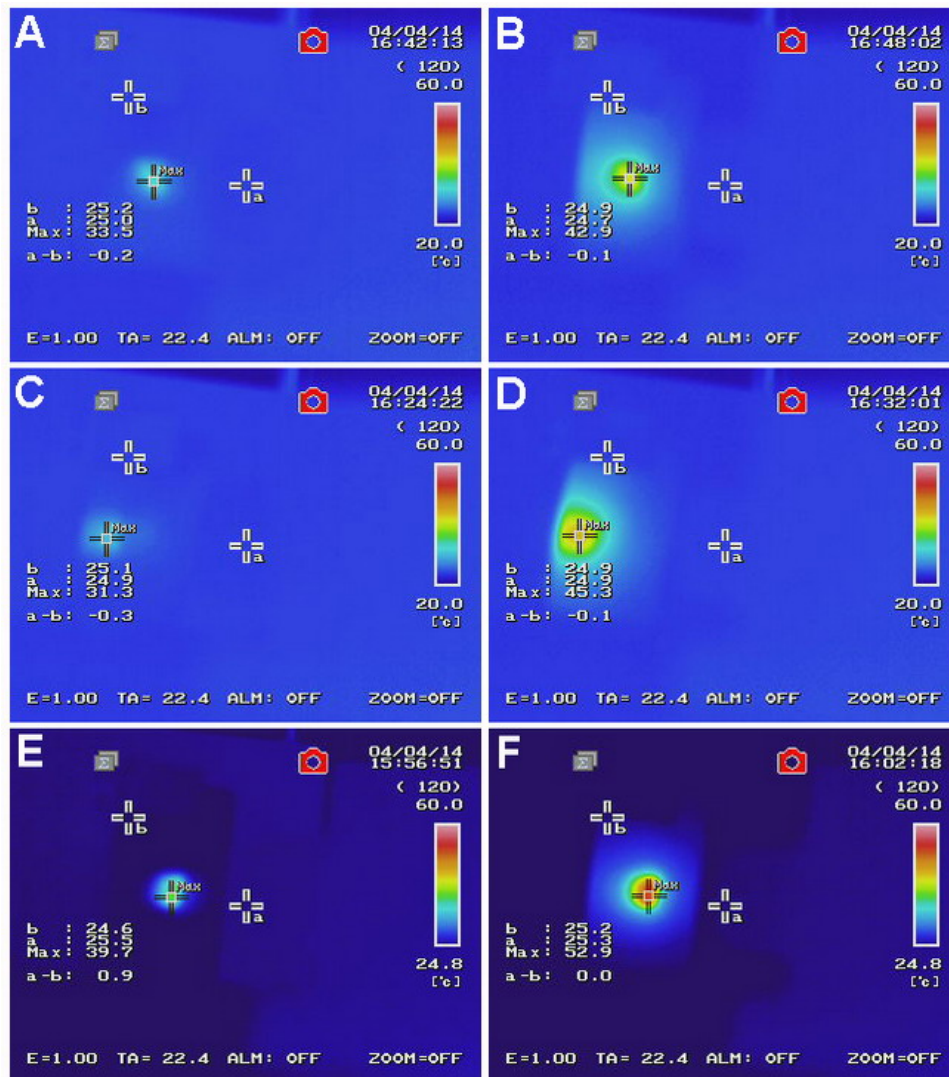

**Figure S6.** Infrared thermal image of (A, B)  $\text{LaF}_3\text{:Yb/Er}$ , (C, D)  $\text{LaF}_3\text{:Yb/Er/Tm}$ , and (E, F)  $\text{LaF}_3\text{:Yb/Er/Tm/Nd}$  HMSs before and after irradiated for 6-8 min under 980 nm laser irradiation with the pump power of  $0.6 \text{ W/cm}^2$ .
